# Supplementary material for: CD47-SIRPα Signaling Induces Epithelial-Mesenchymal Transition and Cancer Stemness and Links to a Poor Prognosis in Patients with Oral Squamous Cell Carcinoma
Source: MDPI journal article supplement (doi:10.3390/cells8121658), 2019-12-17
Supplement: s1 [file s1]

## **SUPPLEMENTARY INFORMATION**

### **CD47-SIRP $\alpha$ signaling induces epithelial-mesenchymal transition, cancer stemness and links to a poor prognosis in patients with oral squamous cell carcinoma**

Disclosed by Shin Pai, MD<sup>1,2</sup>, Oluwaseun Adebayo Bamodu, MD., PhD<sup>3,4</sup>, Yen-Kuang Lin, PhD<sup>5</sup>, Chun-Shu Lin, MD<sup>1,6</sup>, Pei-Yi Chu, MD., PhD<sup>7</sup>, Ming-Hsien Chien, PhD<sup>1</sup>, Liang-Shun Wang, MD., PhD<sup>1,3,8</sup>, Hsiao M, PhD<sup>9</sup>, Chi-Tai Yeh, PhD<sup>1,3,4,10\*</sup>, Jo-Ting Tsai, MD., PhD<sup>1, 11,12\*</sup>

Authors' affiliation: <sup>1</sup>Graduate Institute of Clinical Medicine, College of Medicine, Taipei Medical University, Taipei City, Taiwan; <sup>2</sup>Department of Oral & Maxillofacial Surgery, Saint Martin de Parres Hospital, Chaoyi City, Taiwan; <sup>3</sup>Department of Medical Research and Education, Taipei Medical University - Shuang Ho Hospital, New Taipei City, Taiwan; <sup>4</sup>Department of Hematology and Oncology, Cancer Center, Taipei Medical University - Shuang Ho Hospital, New Taipei City, Taiwan; <sup>5</sup> Biostatistics Center, Taipei Medical University, Taipei, Taiwan, ROC; <sup>6</sup>Department of Radiation Oncology, Tri-Service General Hospital, National Defense Medical Center, Taipei, Taiwan; <sup>7</sup>Department of Pathology, Faculty of Medicine, Fu Jen Catholic University, New Taipei City, Taiwan; <sup>8</sup>Department of Thoracic Surgery, Taipei Medical University - Shuang Ho Hospital, New Taipei City, Taiwan; <sup>9</sup>Genomics Research Center, Academia Sinica, Taipei, Taiwan; <sup>10</sup> Department of Medical Laboratory Science and Biotechnology, Yuanpei University of Medical Technology, Hsinchu, Taiwan; <sup>11</sup>Department of Radiology, School of Medicine, College of Medicine, Taipei Medical University, Taipei, Taiwan; <sup>12</sup>Department of Radiology, Taipei Medical University - Shuang Ho Hospital, New Taipei City, Taiwan.

\*Corresponding author(s):

Chi-Tai Yeh, PhD., Department of Medical Research and Education, Taipei Medical University - Shuang Ho Hospital, New Taipei City 23561, Taiwan; Tel: +886-2-2490088 ext. 8881, Fax: +886-2-2248-0900, E-mail: [ctyeh@s.tmu.edu.tw](mailto:ctyeh@s.tmu.edu.tw)

Jo-Ting Tsai, MD., PhD., Department of Radiation Oncology, Cancer Center, Taipei Medical University - Shuang Ho Hospital, New Taipei City 23561, Taiwan; Tel: +886-2-2490088 ext. 8885, Fax: +886-2-2248-0900, E-mail: [10576@s.tmu.edu.tw](mailto:10576@s.tmu.edu.tw)

\*Title Page (with author names and affiliations)

**Working title:** Targeting the CD47-CSCs-EMT loop enhances radiosensitivity in OSCC

| <b>No.</b> | <b>Target</b> | <b>Dilution</b> | <b>Catalog</b>                           | <b>kDa</b> |
|------------|---------------|-----------------|------------------------------------------|------------|
| <b>1</b>   | CD47          | 1: 1000         | B6H12, sc-12730, Santa Cruz              | 47         |
| <b>2</b>   | GAPDH         | 1:500           | GAPDH (0411K) Mouse mAb SC-27724         | 37         |
| <b>3</b>   | SOX2          | 1:1000          | A-5, sc-365964, Santa Cruz               | 35         |
| <b>4</b>   | OCT4          | 1:1000          | C-10, sc-5279, Santa Cruz                | 45         |
| <b>5</b>   | CD133         | 1:1000          | MAB4399-1, EMD Millipore                 | 120        |
| <b>6</b>   | Vimentin      | 1:1000          | D21H3, #5741, Cell Signaling Technology  | 57         |
| <b>7</b>   | Slug          | 1:1000          | C19G7, #9585, Cell Signaling Technology  | 30         |
| <b>8</b>   | Snail         | 1:1000          | C15D3, #3879, Cell Signaling Technology  | 29         |
| <b>9</b>   | N-cadherin    | 1:500           | D4R1H, #13116, Cell Signaling Technology | 140        |
| <b>10</b>  | E-Cadherin    | 1:500           | 24E10, #3195, Cell Signaling Technology  | 135        |

**Supplementary Table S1.** Western blot antibodies sheet.

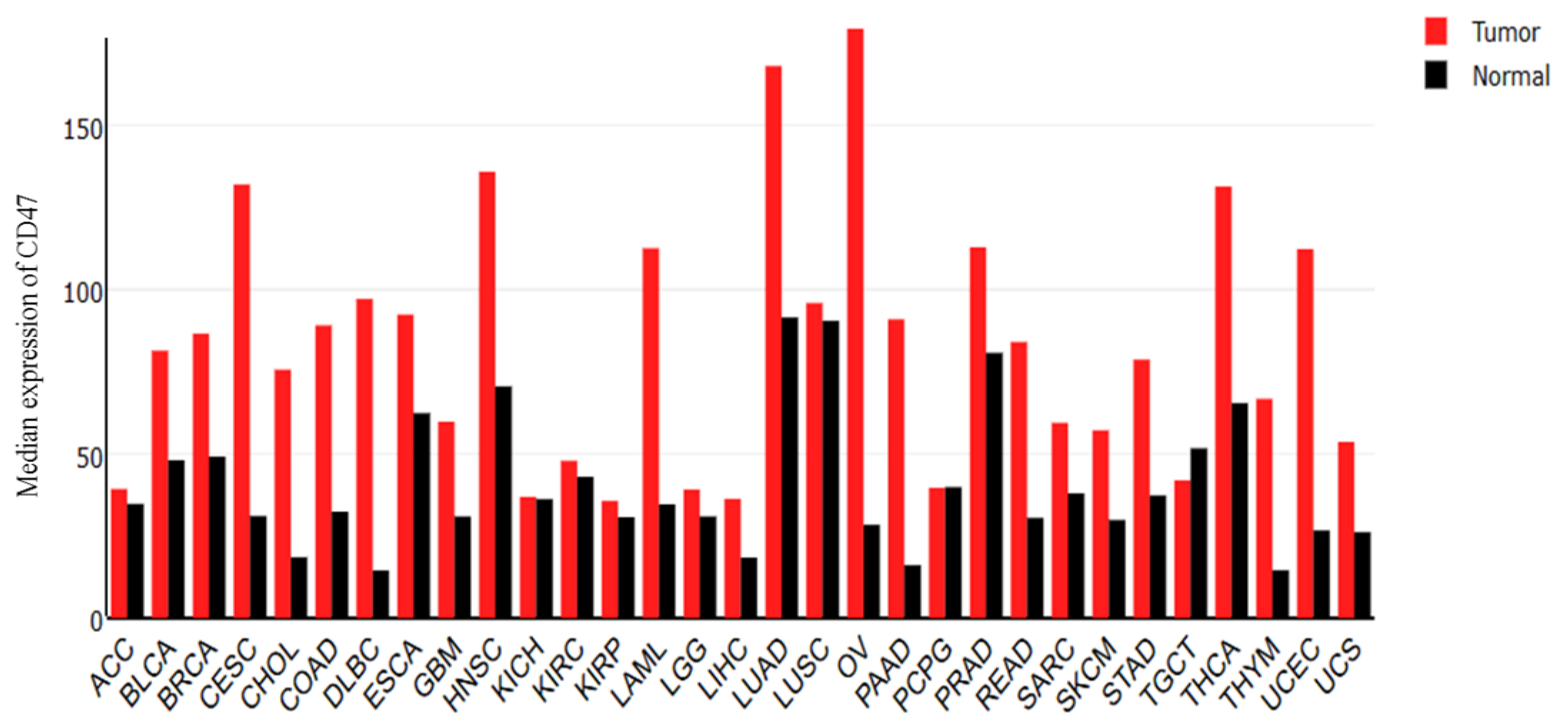

**Supplementary Figure S1. CD47 is aberrantly expressed in human oral squamous cell carcinoma.** Bar plot of the gene expression profile across all paired tumor samples and normal tissues. The bar height represents the median expression of indicated tumor type or normal tissue.

## Orosphere (Sp)

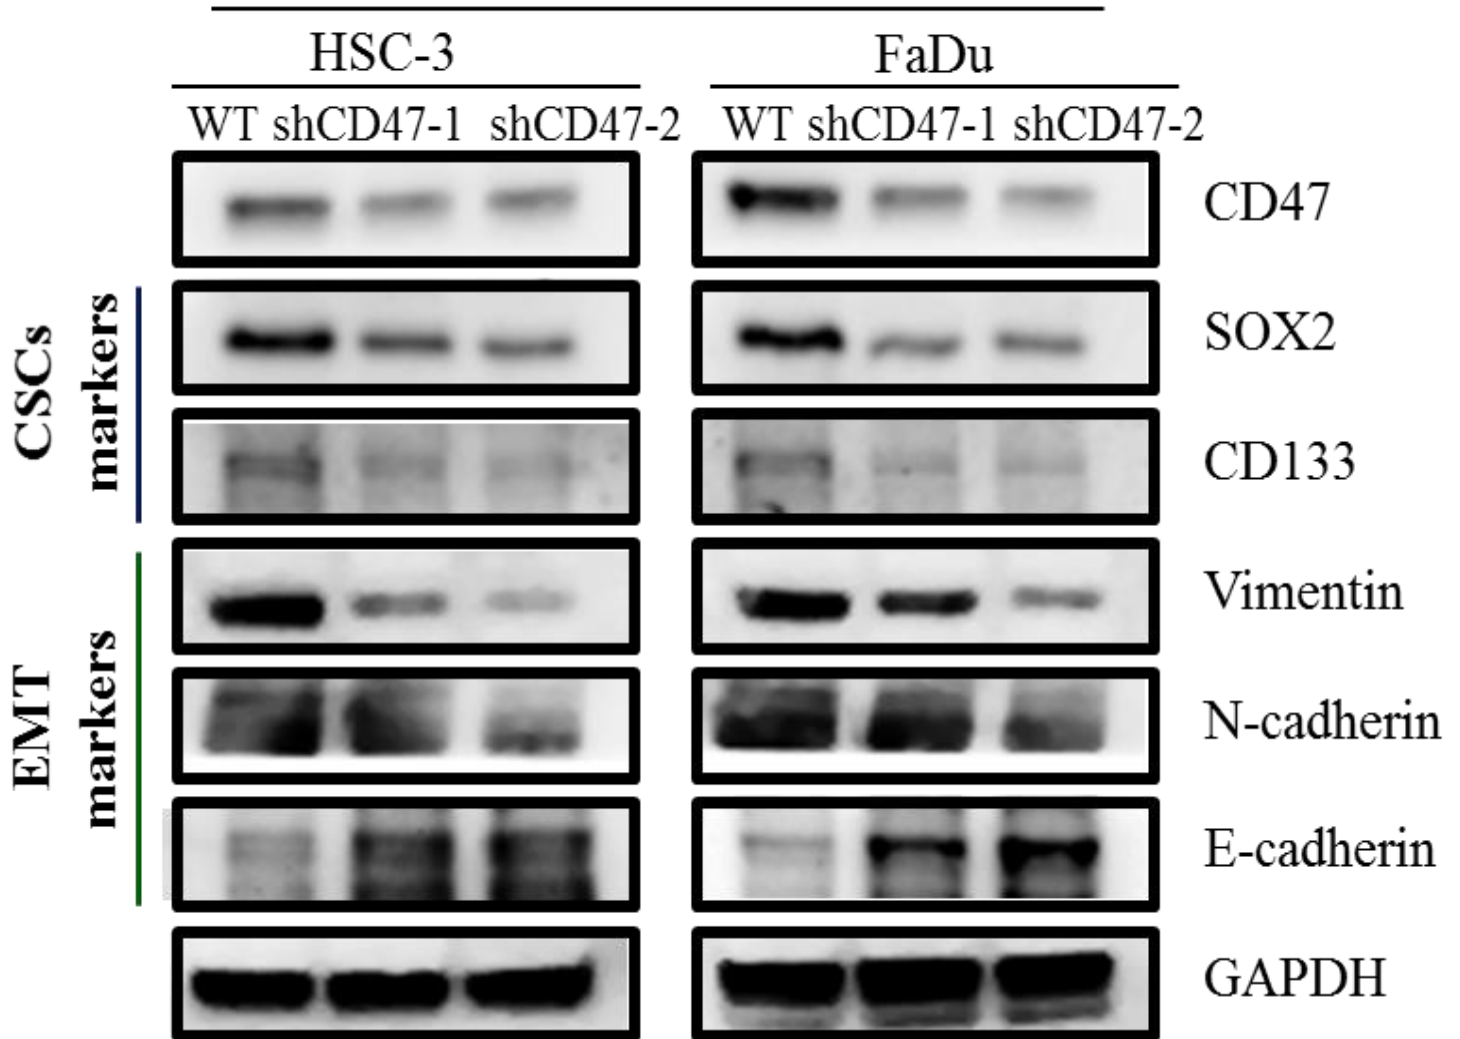

**Supplementary Figure S2. CD47 modulates the cancer stem cell-like and metastatic phenotypes of oral squamous cell carcinoma cells.** The inhibitory effect of shCD47 on the expression level of CD47, Sox2, CD133, vimentin, N-cadherin, and E-cadherin proteins in HSC-3 and FaDu cells as demonstrated by western blot analyses. GAPDH served as loading control.

**A**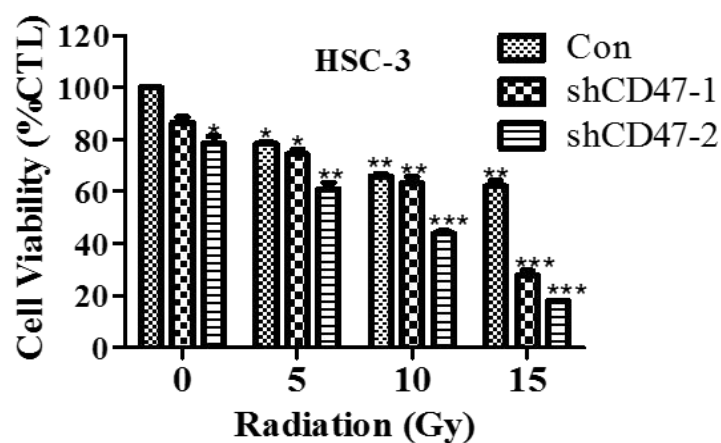**B**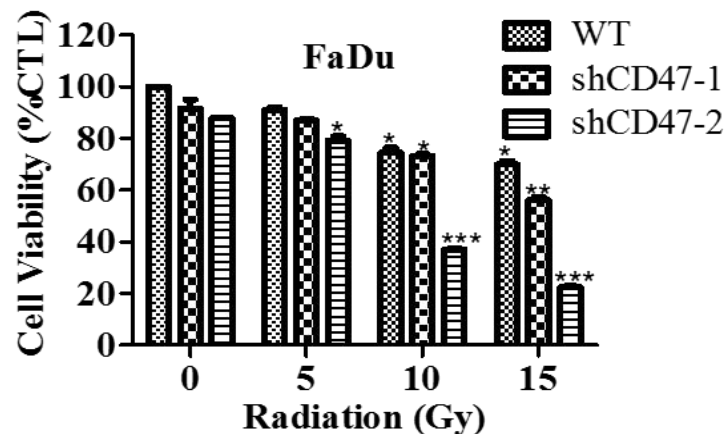**C**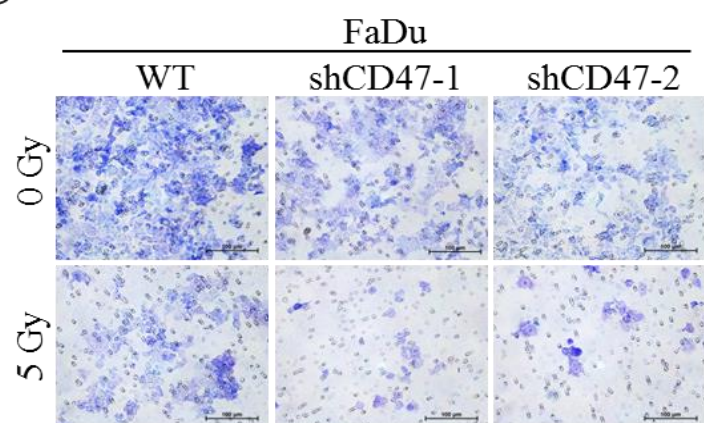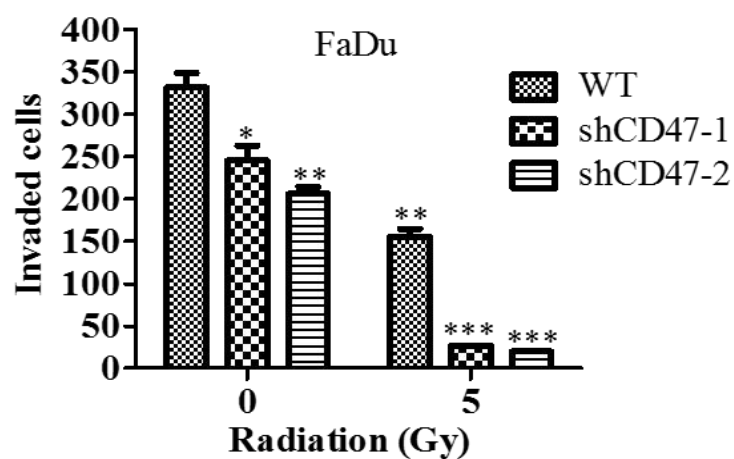**D**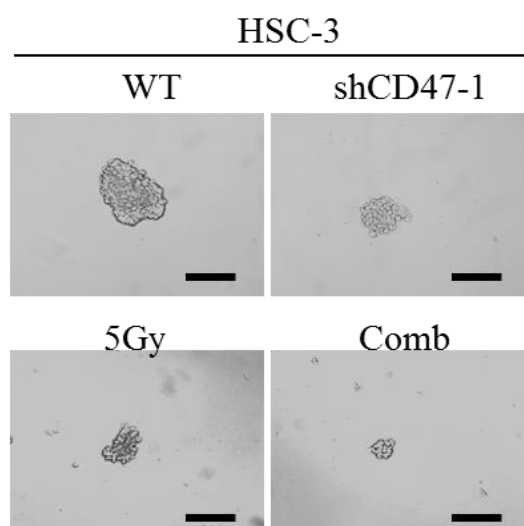**E**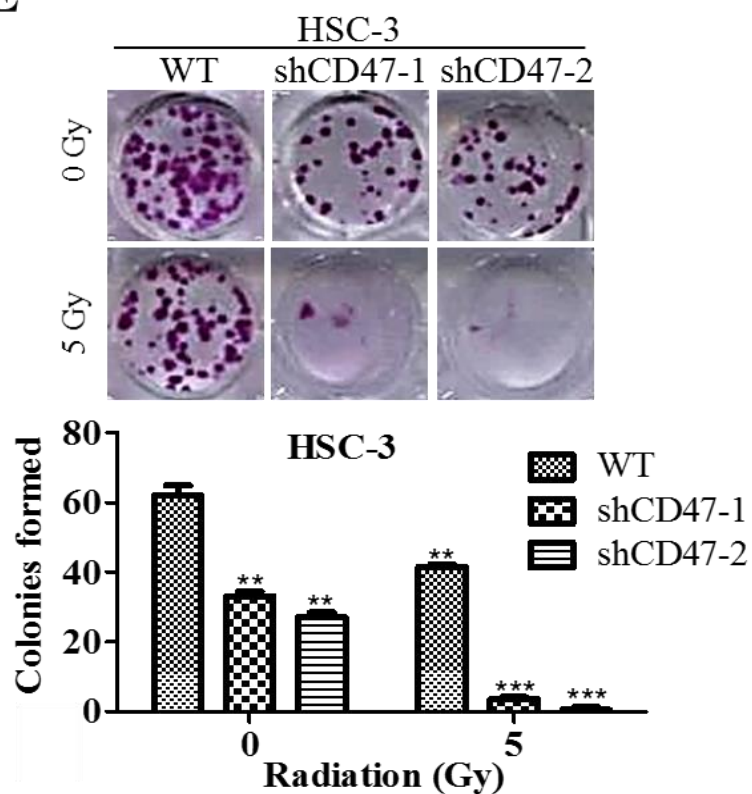

**Supplementary Figure S3. Suppression of CD47 expression enhances the sensitivity of OSCC-SCs to radiation therapy.** shCD47 with or without 0 Gy - 15 Gy radiation decreased the viability of (A) HSC-3 and (B) FaDu cells dose-dependently. (C) Transwell invasion assay images show reduced invasion in 5 Gy-exposed shCD47 FaDu cells, compared to their WT counterparts. (D) shCD47-transfected HSC-3 cells exposed to 5 Gy yielded smaller tumorspheres compared to their WT, shCD47, or 5 Gy alone counterparts. (E) shCD47-1 or shCD47-2 HSC-3 cells formed fewer colonies when exposed to 5 Gy, compared to the WT alone cells. \* $p < 0.05$ , \*\* $p < 0.01$ , \*\*\* $p < 0.001$

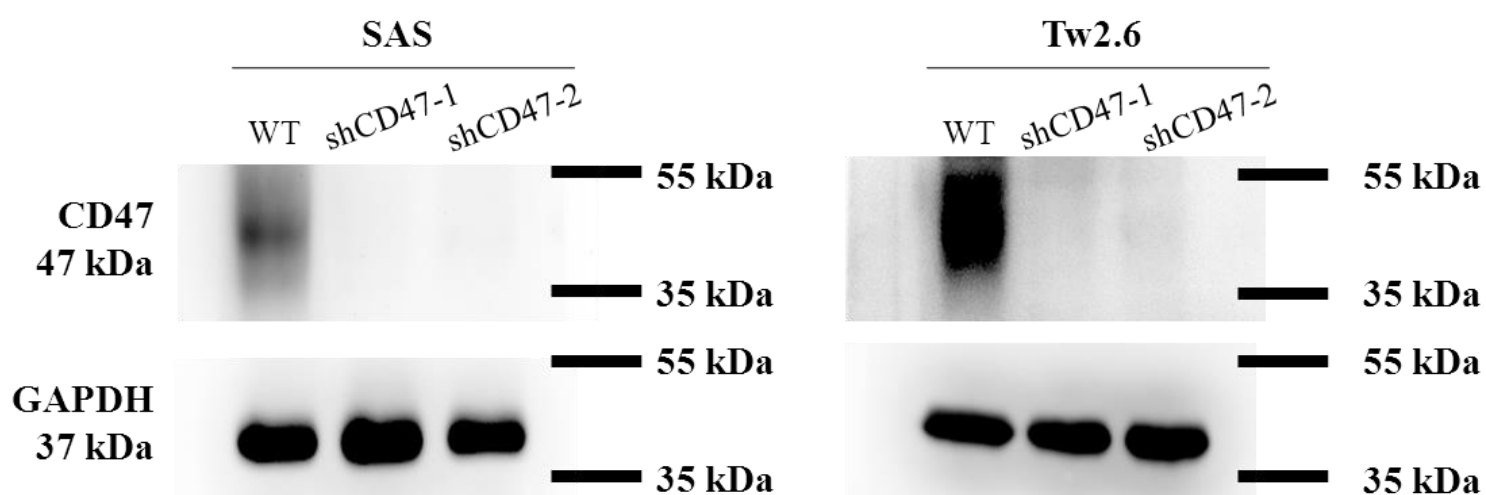

**Supplementary Figure S4.** Full-size blots of Figure 3B

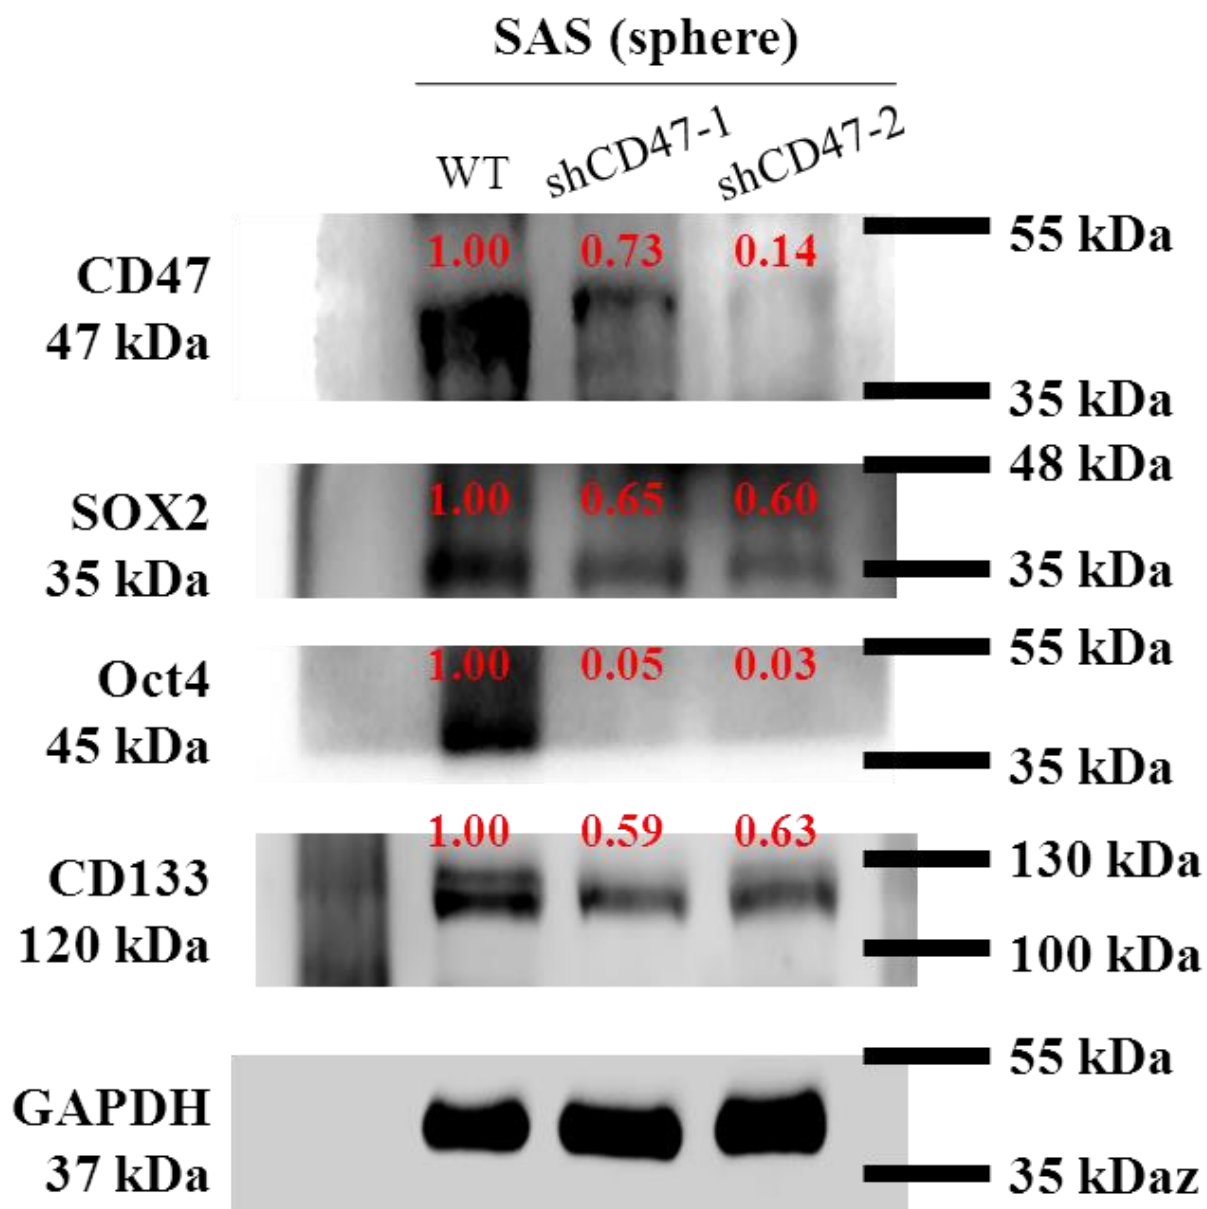

**Supplementary Figure S5.** Full-size blots of Figure 3C

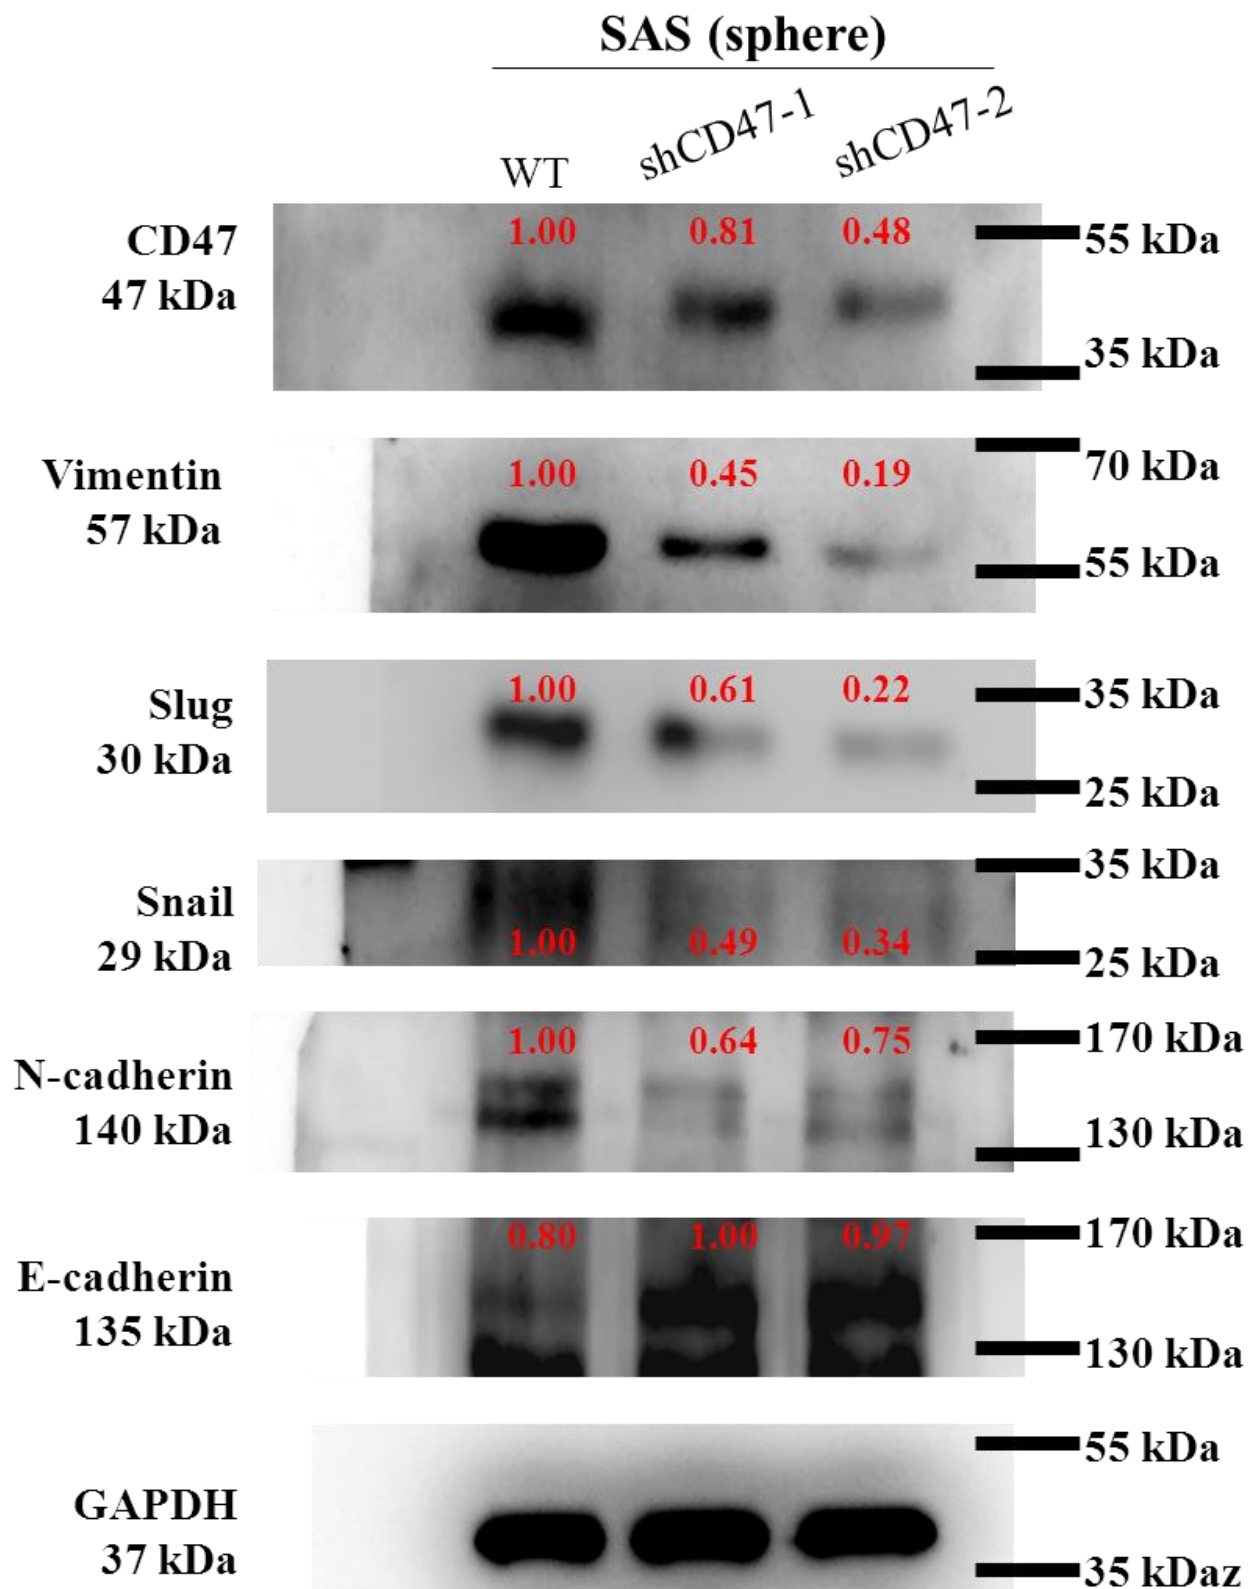

**Supplementary Figure S6.** Full-size blots of Figure 4D

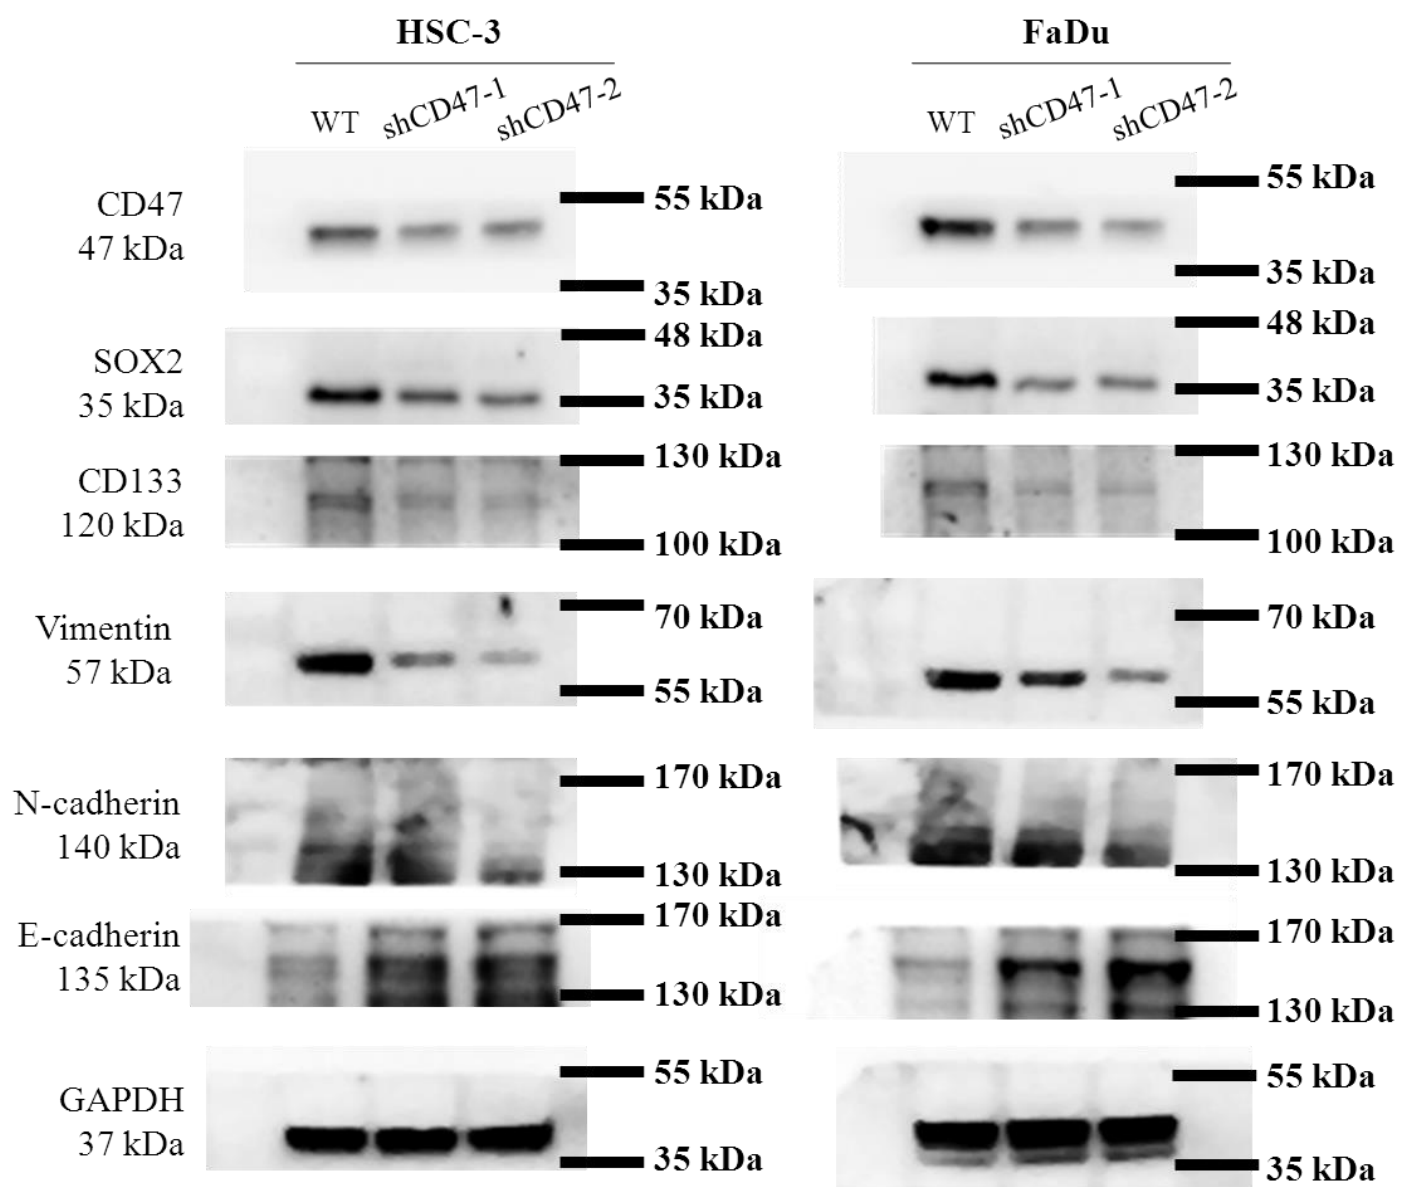

**Supplementary Figure S7.** Full-size blots of Figure S1
